# Supplementary material for: Screen-printed back-to-back electroanalytical sensors: heavy metal ion sensing
Source: Royal Society of Chemistry journal article supplement (doi:10.1039/c5an00381d), 2015-01-01

## **Electronic Supporting Information**

# **Screen-Printed Back-to-Back Electroanalytical Sensors: Heavy Metal Ion Sensing**

Ana P. Ruas de Souza<sup>1,2</sup>, Christopher W. Foster<sup>1</sup>, Athanasios V. Kolliopoulos<sup>1</sup>,  
Mauro Bertotti<sup>2</sup> and Craig E. Banks<sup>2\*</sup>

<sup>1</sup> *Faculty of Science and Engineering, School of Chemistry and the Environment,  
Division of Chemistry and Environmental Science, Manchester Metropolitan University,  
Chester Street, Manchester M15 6GD, UK*

<sup>2</sup> *Instituto de Química – Universidade de São Paulo, 05508-900, São Paulo, SP, Brazil*

**ESI Figure 1:** Image of two bSPEs in the side-by-side configuration comprising of two working, reference and counter electrodes. Distance between the centre of the two working electrodes: 7.5 mm.

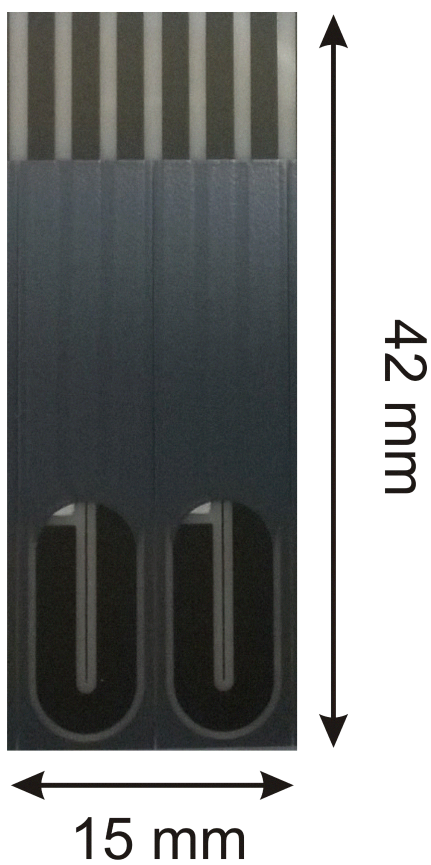

**ESI Figure 2:** Square wave voltammograms (A) for the back-to-back (dotted line) and side-by-side (dashed line) configuration. Solution composition:  $100 \mu\text{g L}^{-1}$  lead (II) ions;  $0.02 \text{ M}$  HCl. Additionally shown (B) is a plot of peak height vs. increasing concentrations of lead (II) ions. ( $N=3$ ) Deposition potential and time of  $-1.2 \text{ V}$  and  $30 \text{ seconds}$  respectively.

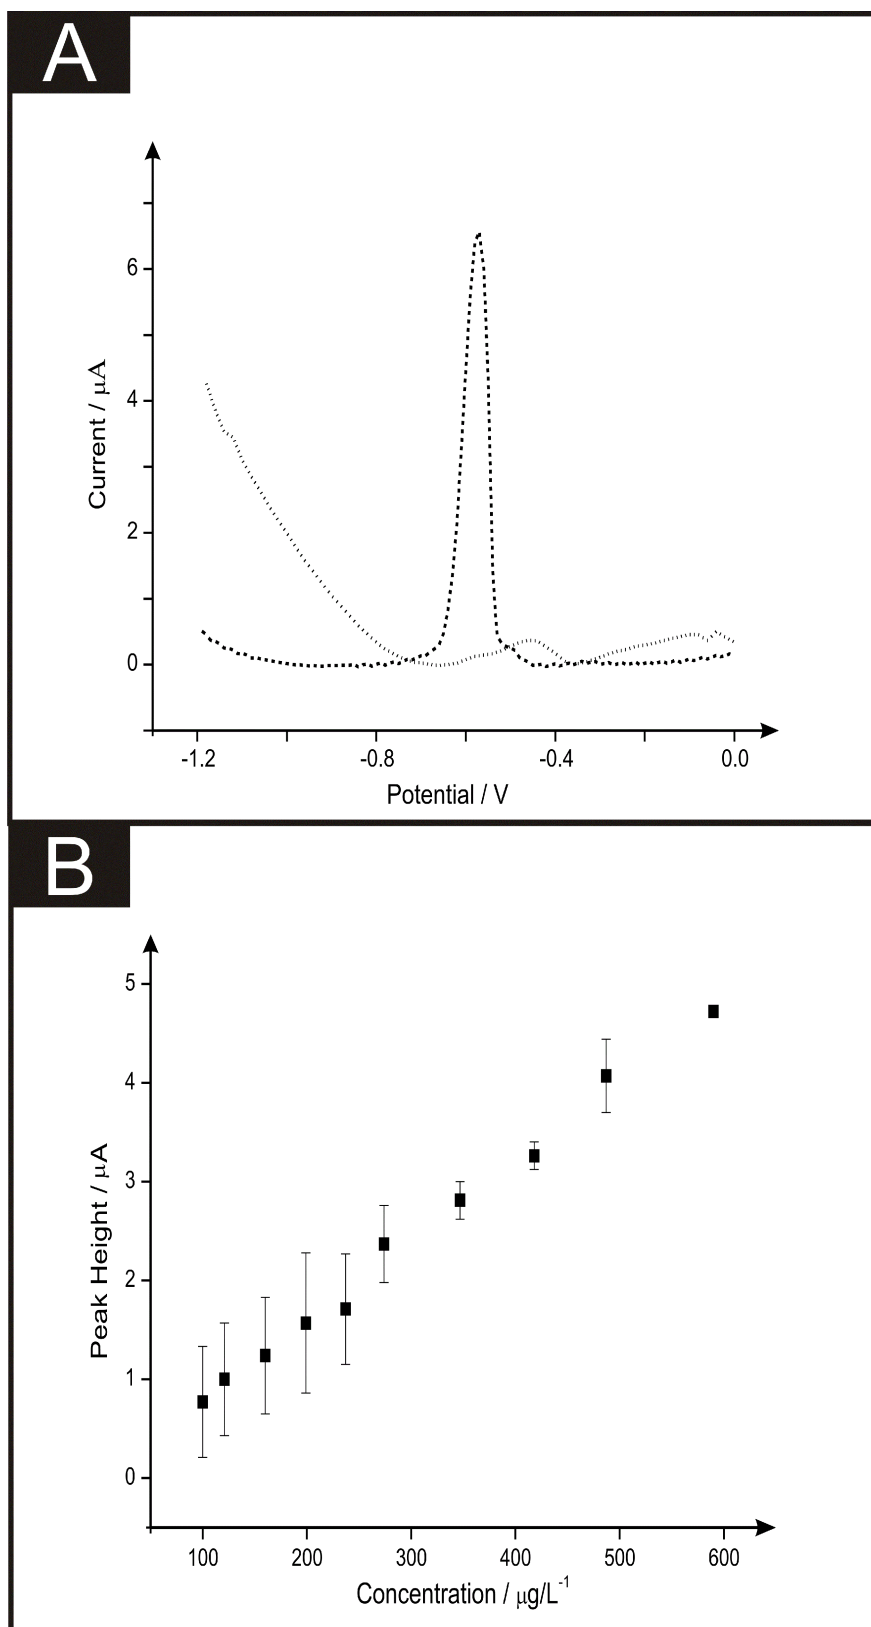

### ESI Figure 3

Calibration plots of lead (II) (A), cadmium (II) (B) and zinc (II) (C) using  $b^2$ SPEs. Data presented is an average and error bars from three experiments. Deposition potential and time of -1.5 V and 120 seconds respectively. A new electrode was used for each addition.

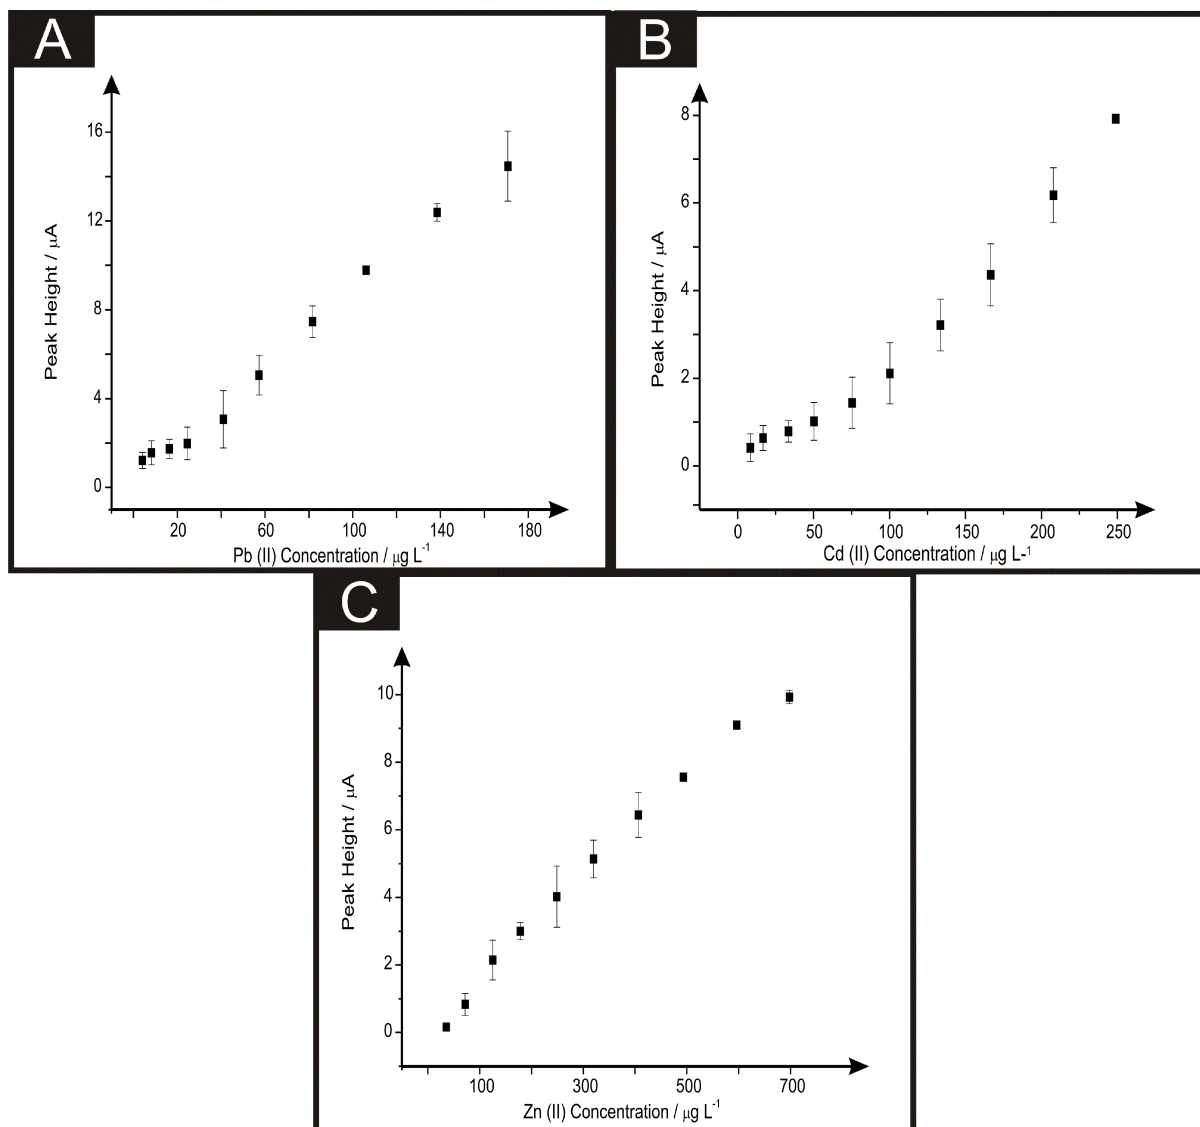

Supplement: c5an00381d1.pdf [file c5an00381d1.pdf]
